# Supplementary material for: ZFP207 sustains pluripotency by coordinating OCT4 stability, alternative splicing and RNA export
Source: PubMed Central journal article supplement (PMC8892232; doi:10.15252/embr.202153191), 2022-01-17
Supplement: EMBR-23-e53191-s003.pdf [file EMBR-23-e53191-s003.pdf]

## Expanded View Figures

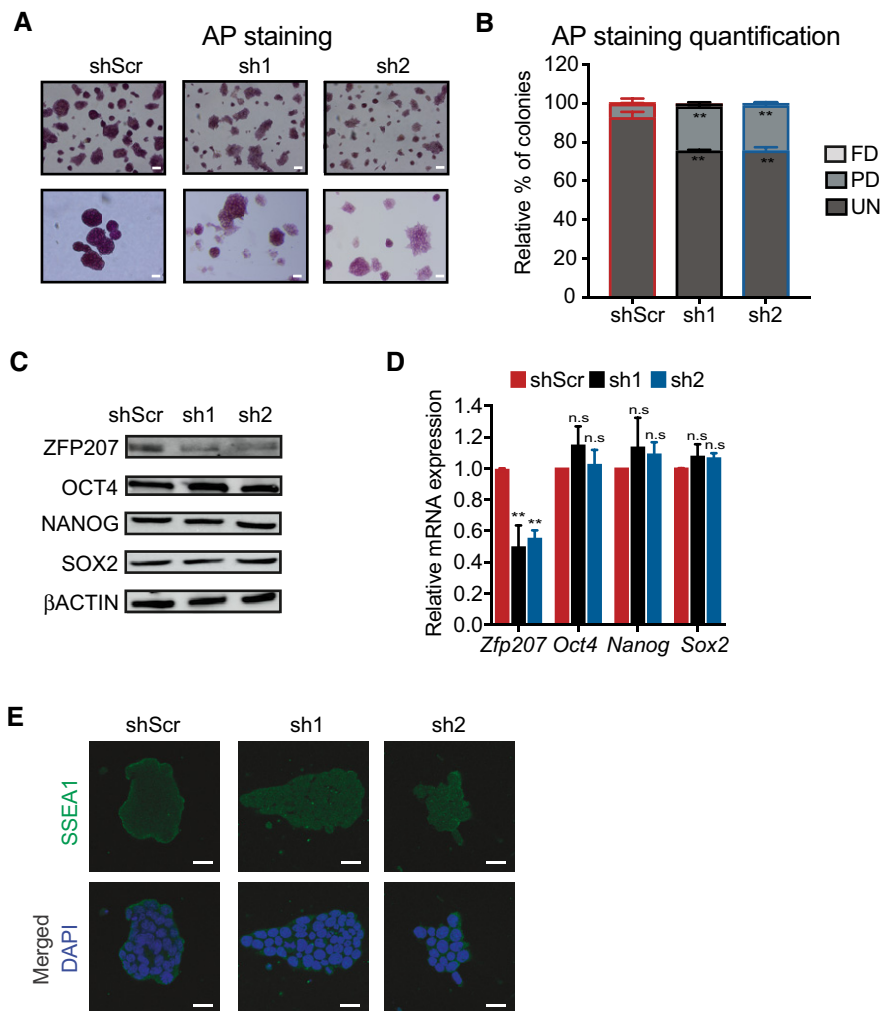

**Figure EV1. ZFP207 is dispensable in mouse ESCs maintained in ground state pluripotency.**

A, B (A) AP staining of shScr and *Zfp207*-depleted (sh1 and sh2) mouse ESCs cultured in 2iL. Scale bars, 20  $\mu$ m. (B) Percentage of fully differentiated (FD), partially differentiated (PD) and undifferentiated (UN) ESC colonies in shScr, sh1 and sh2 cultured in 2iL.

C, D (C) Western blot of ZFP207, OCT4, NANOG, and SOX2 and (D) RT-qPCR analysis of *Zfp207*, *Oct4*, *Nanog*, and *Sox2* in shScr, sh1, and sh2 ESCs cultured in 2iL; data are relative to shScr.

E Immunofluorescence analysis of SSEA1 in shScr, sh1, and sh2 ESCs cultured in 2iL. DAPI was used as the nuclear marker. Scale bars, 20  $\mu$ m.

Data information: Data are presented as mean  $\pm$  SEM or representative images of  $n \geq 3$  independent biological experiments. \*\* $P < 0.01$ , n.s = no significant difference (shScr versus sh1 or sh2). B: unpaired Student's *t*-test; D: Ordinary one-way ANOVA.

Source data are available online for this figure.

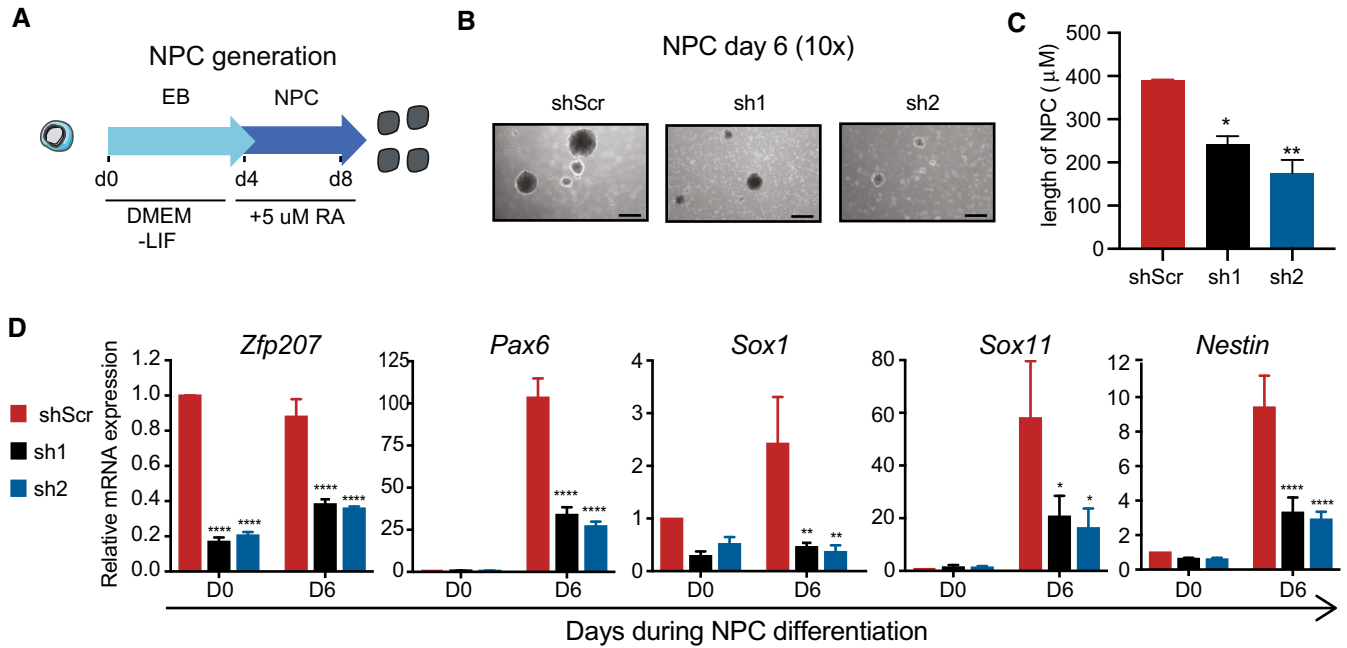

**Figure EV2. *Zfp207* knockdown ESCs cannot generate NPCs.**

A Schematic diagram for neural progenitor cells (NPC) generation. Retinoic acid (RA) was added after four days of EB culture.

B, C (B) Representative bright-field images (10×) and (C) quantification of NPCs on day 6 of differentiation. Scale bars, 200 µm.

D RT-qPCR of *Zfp207* and neural-associated markers in shScr, sh1 and sh2 along the course of neural progenitor (NPC) differentiation. mRNA levels are relative to shScr at day 0.

Data information: Data are presented as mean ± SEM or representative images of  $n \geq 3$  independent biological experiments. \* $P < 0.05$ , \*\* $P < 0.01$ , \*\*\*\* $P < 0.0001$ . C: Ordinary one-way ANOVA; D: two-way ANOVA.

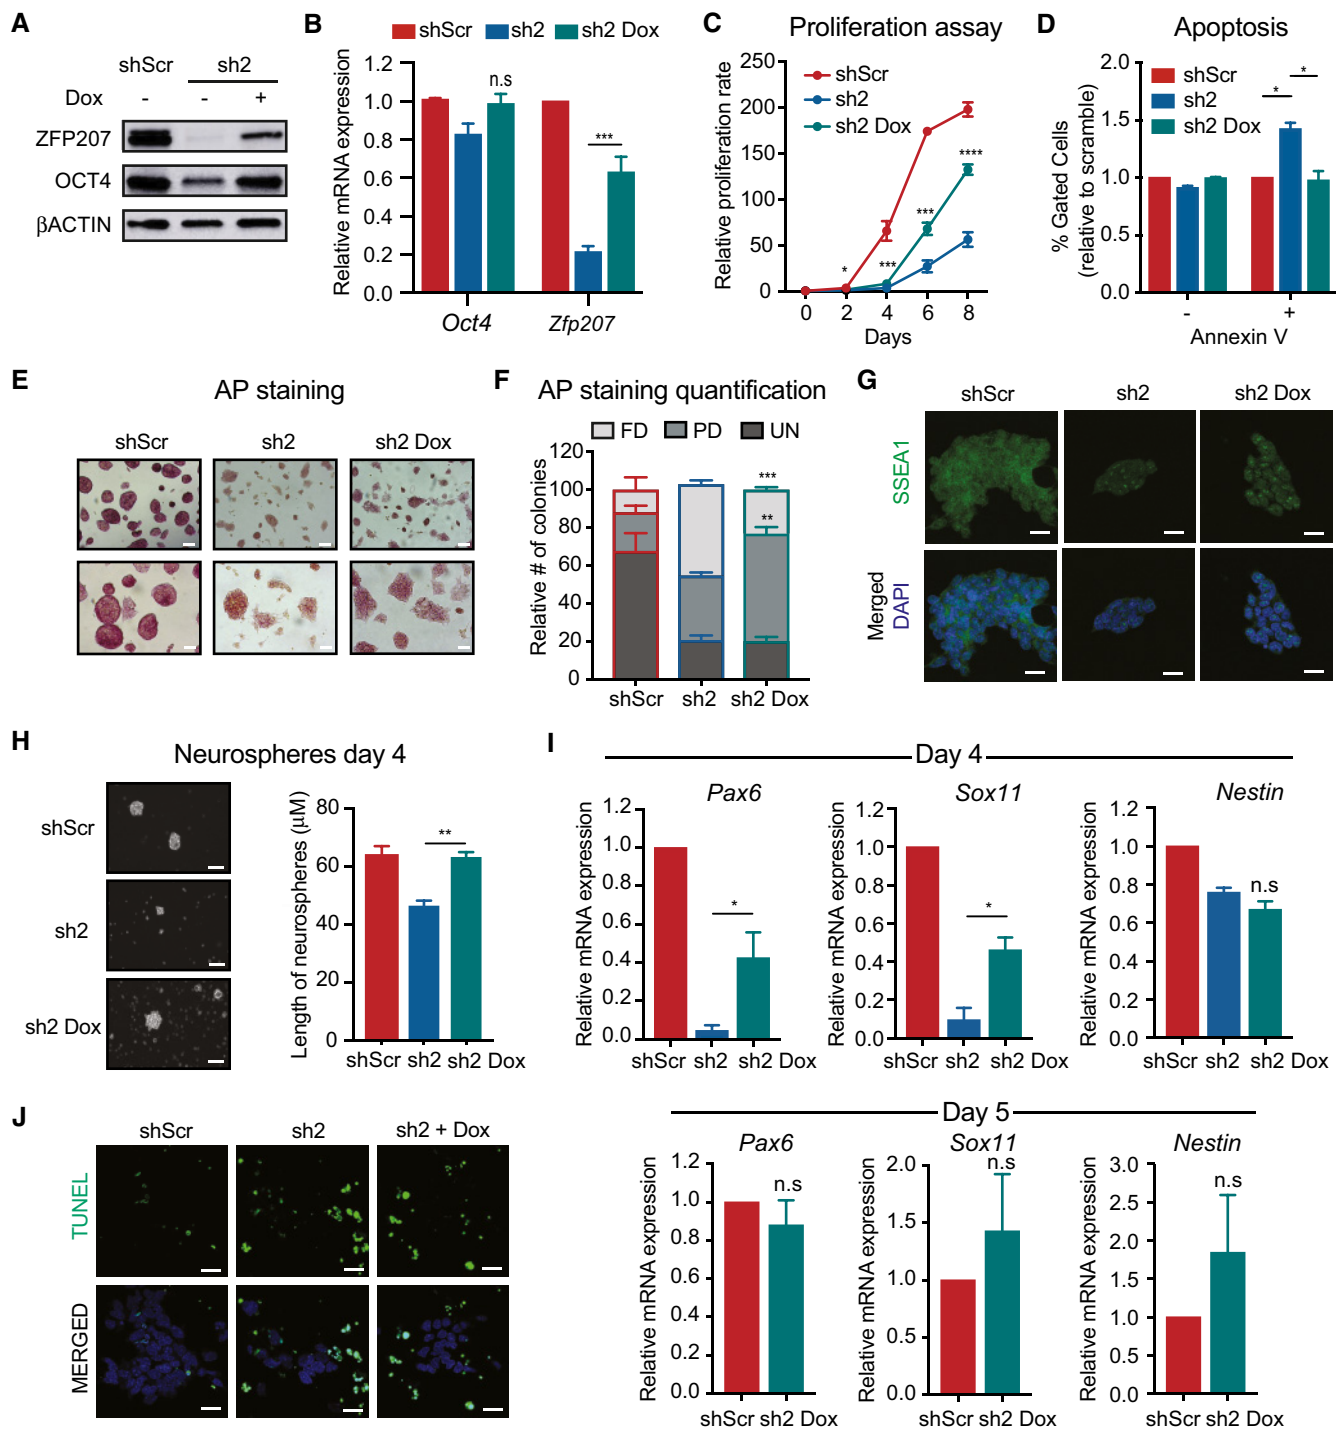

Figure EV3.

**Figure EV3. Re-expression of *Zfp207* in tet(ON)-ZFP207 KD2 rescues the ESC phenotype but it is not sufficient to fully differentiate tet(ON)-ZFP207 KD2 to neurons.**

- A, B (A) Western blot of ZFP207 and OCT4 and (B) RT-qPCR of *Zfp207* and *Oct4* in the tet(ON)-ZFP207 cell line subjected to shScr or sh2 in the absence (–) or presence (+) of doxycycline (Dox) as indicated. mRNA levels are relative to the expression in shScr.  
 C Relative proliferation rate of tet(ON)-ZFP207 ESCs with shScr and sh2 –/+ Dox assessed over a period of 8 days.  
 D Percentage of live (Annexin V–) and apoptotic cells (Annexin V+) in tet(ON)-ZFP207 ESCs with shScr and sh2 –/+ Dox.  
 E, F (E) AP staining of shScr and sh2 –/+ Dox in tet(ON)-ZFP207 ESCs. Scale bar, 50  $\mu$ M. (F) Percentage of fully differentiated (FD), partially differentiated (PD) and undifferentiated (UN) ESC colonies in shScr and sh2 –/+ Dox treatment in tet(ON)-ZFP207.  
 G Immunofluorescence analysis of SSEA1 in tet(ON)-ZFP207 ESCs with shScr and sh2 –/+ Dox. DAPI was used as the nuclear marker. Scale bars, 20  $\mu$ m.  
 H Representative bright-field images (20x) and quantification of neurospheres on day 4 of differentiation. Scale bars, 200  $\mu$ m.  
 I RT-qPCR of neural-associated markers in tet(ON)-ZFP207 ESCs with shScr and sh2 –/+ Dox at day 4 (upper panel) and tet(ON)-ZFP207 ESCs with shScr and sh2 +Dox at day 5 (lower panel). mRNA levels are relative to shScr.  
 J TUNEL (green) staining in tet(ON)-ZFP207 ESCs with shScr and sh2 +Dox at day 5. Nuclei were counterstained with DAPI. Scale bar, 20  $\mu$ m.

Data information: Data are presented as mean  $\pm$  SEM or representative images of  $n \geq 3$  independent biological experiments. \* $P < 0.05$ , \*\* $P < 0.01$ , \*\*\* $P < 0.001$ , \*\*\*\* $P < 0.0001$ , ns = no significant difference (sh2 versus sh2 Dox). B, C, D, F and I: unpaired Student's *t*-test.

Source data are available online for this figure.

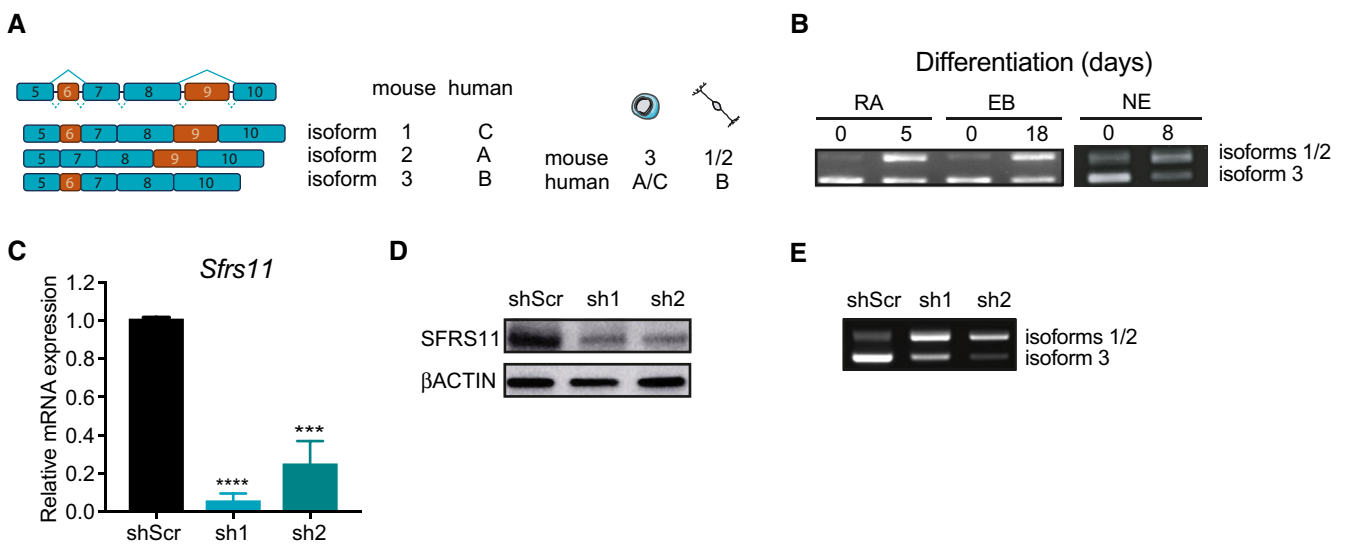

**Figure EV4. *Zfp207* undergoes alternative splicing during differentiationz.**

- A, B (A) Schema showing a segment in transcript variants with alternatively spliced exons of *Zfp207* in mouse and human (left panel). The differential switch of the splice forms between the ESC state and neural-directed differentiation in mouse and human are also depicted (right panel). (B) RT-PCR analysis of the AS forms of *Zfp207* at the indicated time points of retinoic acid (RA) -induced differentiation, embryoid body (EB) generation and neuroectodermal (NE) differentiation of mouse ESCs.  
 C–E (C) RT-qPCR and (D) western blot to monitor the knockdown efficiency of *Sfrs11* (sh1 and sh2). (E) RT-PCR analysis of the AS forms of *Zfp207* upon depletion of *Sfrs11*.

Data information: Data are presented as mean  $\pm$  SEM or representative images of  $n \geq 3$  independent biological experiments. \*\*\* $P < 0.001$ , \*\*\*\* $P < 0.0001$  (shScr versus sh1 or sh2). C: unpaired Student's *t*-test.

Source data are available online for this figure.

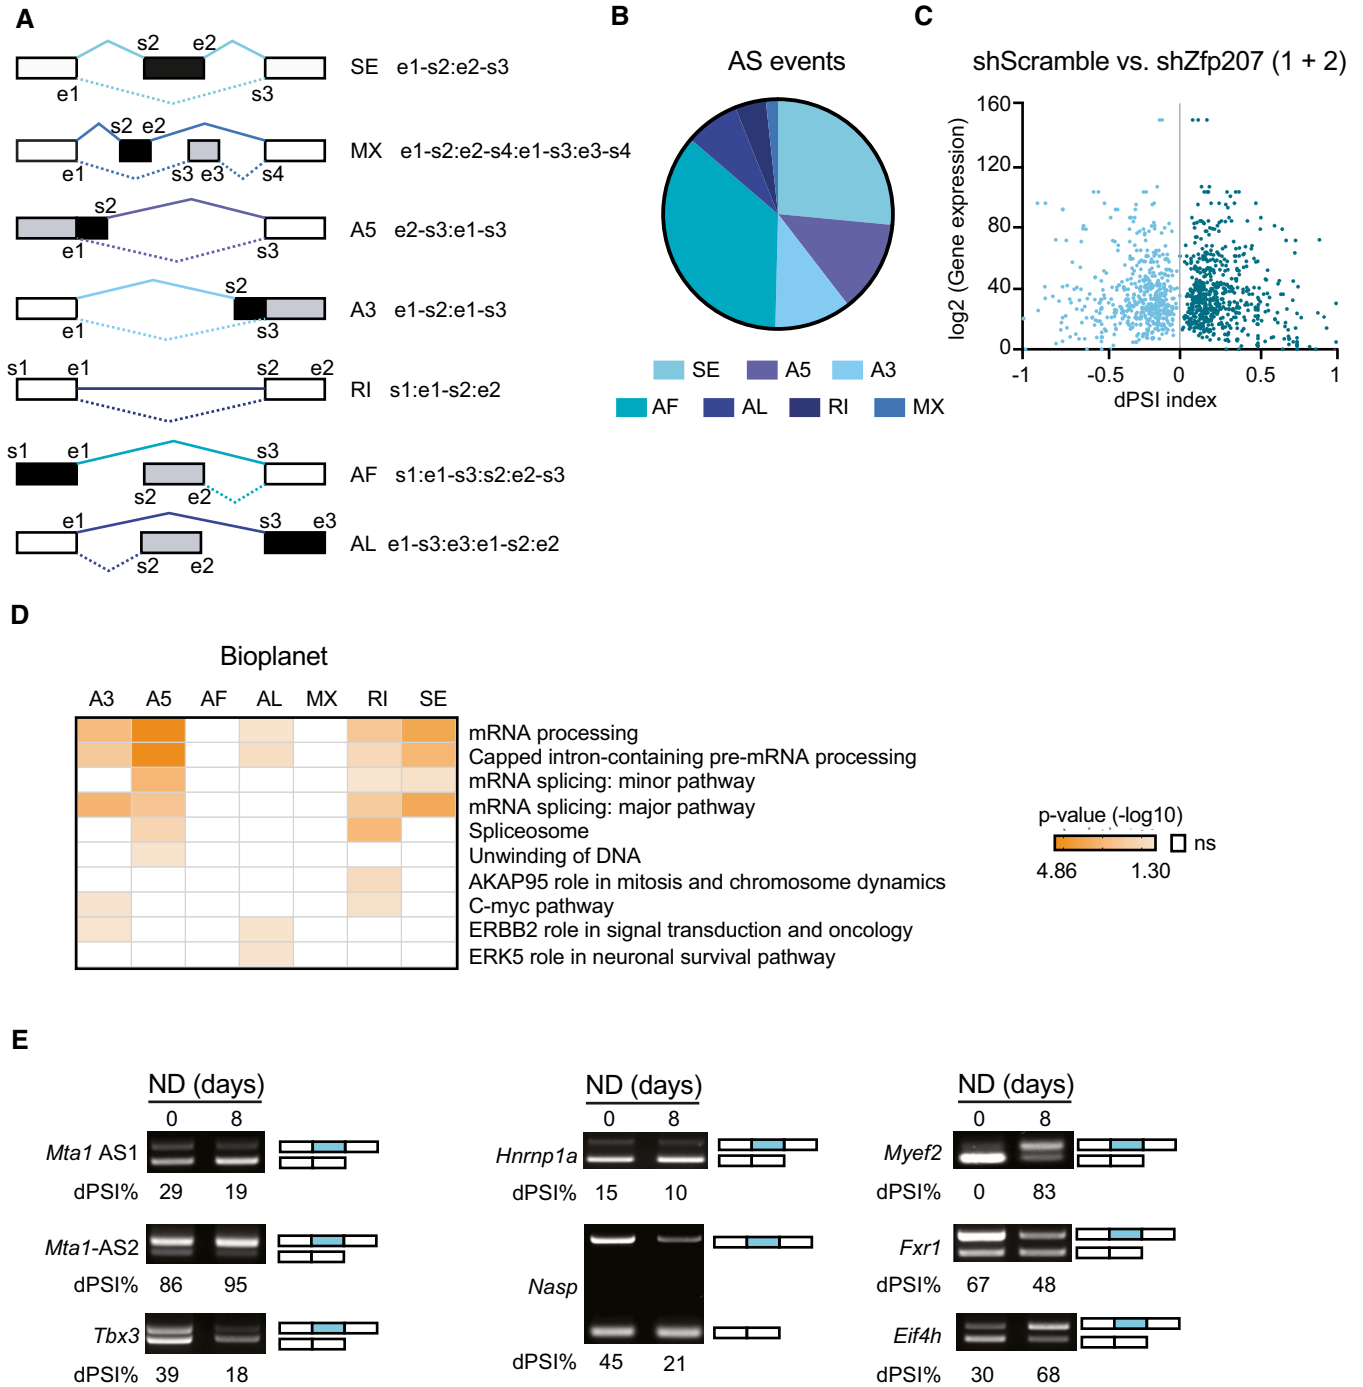

**Figure EV5. Alternative splicing switches in *Zfp207* knockdown ESCs are prevalent in differentiated cells.**

A Schema depicting the types of AS events: SE, skipped exon; MX, mutually exclusive exons; A5, alternative 5' splice-site; A3, alternative 3' splice site; RI, retained intron; AF, alternative first exon; AL, alternative last exon, generated by the software SUPPA2 with the specific coordinates, including start (s) and end (e). The form of the AS event is depicted in black.

B Pie chart showing the AS events types distribution.

C Volcano plot depicting the correlation between gene expression levels and dPSI index resulted from RNA-seq data analysis in control (scShr) and *Zfp207* depleted mouse ESCs (sh1 + sh2). Gene expression levels are presented as log2 transformed values. Differential percent spliced in index (dPSI) range is between -1 and +1.

D Gene ontology enrichment analysis with Bioplanet software for genes undergoing different splicing events upon *Zfp207* depletion (sh1 and sh2).

E Representative RT-PCR analysis of AS events upon neural differentiation in mouse ESCs for *Mta1* (AS1 and AS2), *Tbx3*, *Hnrnp1a*, *Nasp*, *Myef2*, *Fxr1*, and *Eif4H*. The structure of each isoform is indicated (not to scale). Alternative exons are blue. PSI was quantified for each condition.
