# Supplementary material for: ZFP207 sustains pluripotency by coordinating OCT4 stability, alternative splicing and RNA export
Source: PubMed Central journal article supplement (PMC8892232; doi:10.15252/embr.202153191), 2022-01-17

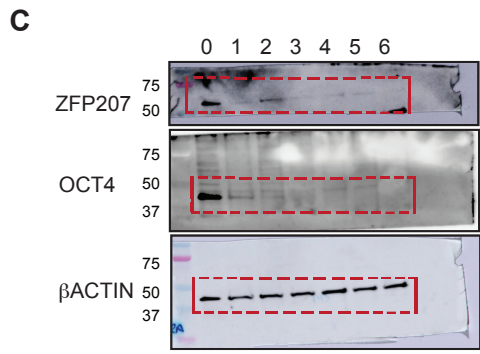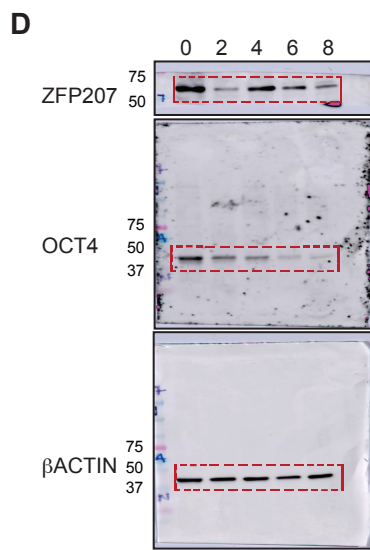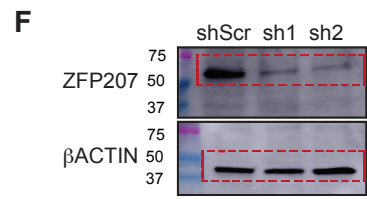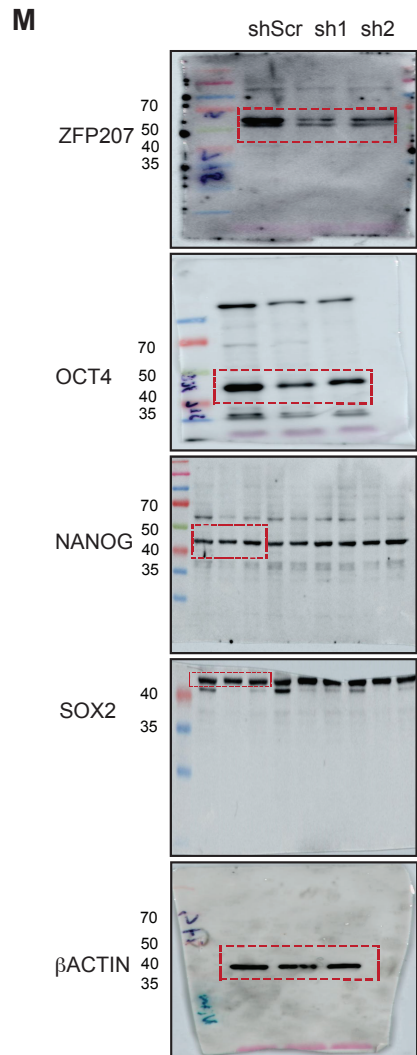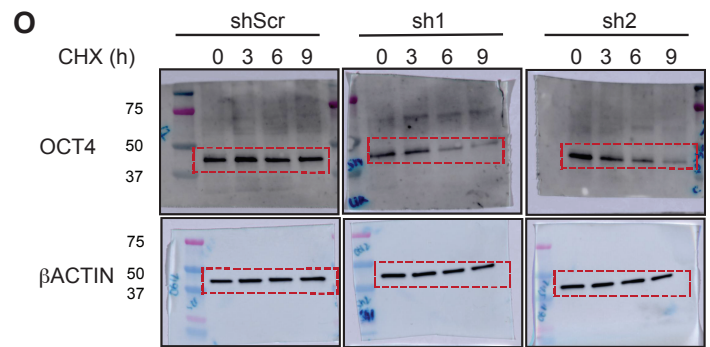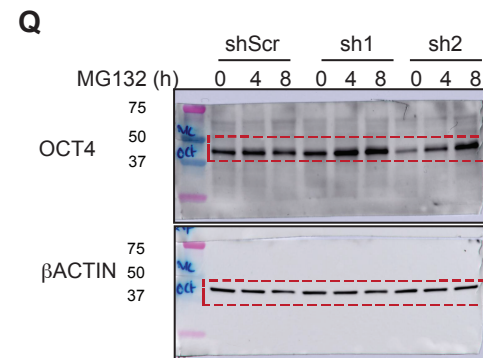

Supplement: EMBR-23-e53191-s007.pdf [file EMBR-23-e53191-s007.pdf]
